# Supplementary material for: Does Oral Health-Related Quality of Life Differ by Income Group? Findings from a Nationally Representative Survey
Source: MDPI journal article supplement (doi:10.3390/ijerph191710826), 2022-08-30
Supplement: s1 [file s1]

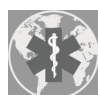

**Supplementary Table S1.** Determinants of oral health-related quality of life (all covariates are displayed). Results of multiple linear regressions.

| Independent Variables                                                                                                          | Oral Health-Related Quality of Life—with Listwise Deletion to Address Missing Values | Oral Health-Related Quality of Life—with FIML to Address Missing Values |
|--------------------------------------------------------------------------------------------------------------------------------|--------------------------------------------------------------------------------------|-------------------------------------------------------------------------|
| Lowest income decile (Ref.: Second to ninth income decile)                                                                     | 0.75 **<br>(0.25)                                                                    | 0.72 **<br>(0.24)                                                       |
| Highest income decile                                                                                                          | −0.29 +<br>(0.17)                                                                    | −0.28 +<br>(0.16)                                                       |
| Gender: -Women (Ref.: Men)                                                                                                     | −0.26 +<br>(0.14)                                                                    | −0.23 +<br>(0.13)                                                       |
| - Diverse                                                                                                                      | 0.16<br>(1.86)                                                                       | 0.25<br>(1.83)                                                          |
| Age                                                                                                                            | −0.02 ***<br>(0.01)                                                                  | −0.02 ***<br>(0.01)                                                     |
| Marital status: -Married, living together with spouse (Ref.: Single/Divorced/Widowed/Married, not living together with spouse) | −0.11<br>(0.14)                                                                      | −0.09<br>(0.13)                                                         |
| Highest educational degree: -Qualification for applied upper secondary school (Ref.: upper secondary school)                   | 0.15<br>(0.21)                                                                       | 0.20<br>(0.19)                                                          |
| - Polytechnic Secondary School                                                                                                 | 0.43<br>(0.32)                                                                       | 0.43<br>(0.30)                                                          |
| - Intermediate Secondary School                                                                                                | 0.31 *<br>(0.15)                                                                     | 0.25 +<br>(0.14)                                                        |
| - Lower Secondary School                                                                                                       | 0.54 *<br>(0.24)                                                                     | 0.48 *<br>(0.23)                                                        |
| - Currently in school training/education                                                                                       | 1.99<br>(1.40)                                                                       | 1.70<br>(1.28)                                                          |
| - Without school-leaving qualification                                                                                         | 2.44<br>(1.91)                                                                       | 2.51<br>(1.90)                                                          |
| Employment status: -Retired (Ref.: Full-time employed)                                                                         | 0.07<br>(0.21)                                                                       | 0.06<br>(0.20)                                                          |
| - Other                                                                                                                        | −0.10<br>(0.16)                                                                      | −0.17<br>(0.14)                                                         |
| Chronic diseases: Presence of at least one chronic disease (Absence of chronic diseases)                                       | 0.45 **<br>(0.15)                                                                    | 0.40 **<br>(0.14)                                                       |
| Self-rated health (1 = very bad to 5 = very good)                                                                              | −0.66 ***<br>(0.10)                                                                  | −0.68 ***<br>(0.09)                                                     |
| Constant                                                                                                                       | 5.50 ***<br>(0.49)                                                                   | 5.53 ***<br>(0.45)                                                      |
| Observations                                                                                                                   | 2761                                                                                 | 3075                                                                    |
| R <sup>2</sup>                                                                                                                 | 0.07                                                                                 | 0.06                                                                    |

Unstandardized beta-coefficients are displayed; robust standard errors (SE) in parentheses; \*\*\*  $p < 0.001$ , \*\*  $p < 0.01$ , \*  $p < 0.05$ , +  $p < 0.10$ ; Covariates include gender, age, marital status, education, employment status, presence of chronic diseases and self-rated health.

**Supplementary Table S2.** Determinants of ‘Oral function: Difficulty chewing foods’. Results of multiple linear regressions.

| Independent Variables                                      | Oral Function: Difficulty Chewing Foods–<br>with Listwise Deletion to Address Missing<br>Values | Oral Function: Difficulty Chewing Foods–<br>with FIML to Address Missing Values |
|------------------------------------------------------------|-------------------------------------------------------------------------------------------------|---------------------------------------------------------------------------------|
| Lowest income decile (Ref.: Second to ninth income decile) | 0.18 ** (0.07)                                                                                  | 0.17 ** (0.06)                                                                  |
| Highest income decile                                      | −0.02 (0.05)                                                                                    | −0.02 (0.05)                                                                    |
| Covariates                                                 | √                                                                                               | √                                                                               |
| Observations                                               | 2761                                                                                            | 3075                                                                            |
| R <sup>2</sup>                                             | 0.05                                                                                            | 0.05                                                                            |

Unstandardized beta-coefficients are displayed; robust standard errors (SE) in parentheses; \*\*  $p < 0.01$ ; Covariates include gender, age, marital status, education, employment status, presence of chronic diseases and self-rated health. Thus, a tick symbol (√) was used.

**Supplementary Table S3.** Determinants of ‘Oral function: Less flavor in food’. Results of multiple linear regressions.

| Independent variables                                      | Oral Function: Less Flavor in Food–with<br>Listwise Deletion to Address Missing<br>Values | Oral Function: Less flavor in Food–with<br>FIML to Address Missing Values |
|------------------------------------------------------------|-------------------------------------------------------------------------------------------|---------------------------------------------------------------------------|
| Lowest income decile (Ref.: Second to ninth income decile) | 0.08 (0.05)                                                                               | 0.07 (0.05)                                                               |
| Highest income decile                                      | −0.06 (0.04)                                                                              | −0.06 (0.04)                                                              |
| Covariates                                                 | √                                                                                         | √                                                                         |
| Observations                                               | 2761                                                                                      | 3075                                                                      |
| R <sup>2</sup>                                             | 0.03                                                                                      | 0.03                                                                      |

Unstandardized beta-coefficients are displayed; robust standard errors (SE) in parentheses; Covariates include gender, age, marital status, education, employment status, presence of chronic diseases and self-rated health. Thus, a tick symbol (√) was used.

**Supplementary Table S4.** Determinants of ‘Appearance: Unfomfortable about appearance’. Results of multiple linear regressions.

| Independent Variables                                      | Appearance: Unfomfortable about<br>Appearance–with Listwise Deletion to<br>Address Missing Values | Appearance: Unfomfortable about<br>Appearance–with FIML to Address<br>Missing Values |
|------------------------------------------------------------|---------------------------------------------------------------------------------------------------|--------------------------------------------------------------------------------------|
| Lowest income decile (Ref.: Second to ninth income decile) | 0.18 ** (0.07)                                                                                    | 0.18 ** (0.06)                                                                       |
| Highest income decile                                      | −0.05 (0.04)                                                                                      | −0.05 (0.04)                                                                         |
| Covariates                                                 | √                                                                                                 | √                                                                                    |
| Observations                                               | 2761                                                                                              | 3075                                                                                 |
| R <sup>2</sup>                                             | 0.05                                                                                              | 0.05                                                                                 |

Unstandardized beta-coefficients are displayed; robust standard errors (SE) in parentheses; \*\*  $p < 0.01$ ; Covariates include gender, age, marital status, education, employment status, presence of chronic diseases and self-rated health. Thus, a tick symbol (√) was used.

**Supplementary Table S5.** Determinants of ‘Oral function: Difficulty chewing foods’. Results of multiple linear regressions.

| Independent Variables                                      | Oral Function: Difficulty Chewing Foods–<br>with Listwise Deletion to Address Missing<br>Values | Oral Function: Difficulty Chewing Foods–<br>with FIML to Address Missing Values |
|------------------------------------------------------------|-------------------------------------------------------------------------------------------------|---------------------------------------------------------------------------------|
| Lowest income decile (Ref.: Second to ninth income decile) | 0.17 * (0.08)                                                                                   | 0.17 * (0.08)                                                                   |
| Highest income decile                                      | −0.10 * (0.05)                                                                                  | −0.10 * (0.05)                                                                  |
| Covariates                                                 | √                                                                                               | √                                                                               |
| Observations                                               | 2761                                                                                            | 3075                                                                            |
| R <sup>2</sup>                                             | 0.06                                                                                            | 0.06                                                                            |

Unstandardized beta-coefficients are displayed; robust standard errors (SE) in parentheses; \*  $p < 0.05$ ; Covariates include gender, age, marital status, education, employment status, presence of chronic diseases and self-rated health. Thus, a tick symbol (√) was used.

**Supplementary Table S6.** Determinants of ‘Psychosocial impact: Difficulty doing your usual jobs’. Results of multiple linear regressions.

| Independent Variables                                      | Psychosocial Impact: Difficulty Doing Your Usual Jobs—with Listwise Deletion to Address Missing Values | Psychosocial Impact: Difficulty Doing Your Usual Jobs—with FIML to Address Missing Values |
|------------------------------------------------------------|--------------------------------------------------------------------------------------------------------|-------------------------------------------------------------------------------------------|
| Lowest income decile (Ref.: Second to ninth income decile) | 0.15 ** (0.05)                                                                                         | 0.14 ** (0.05)                                                                            |
| Highest income decile                                      | −0.06 + (0.03)                                                                                         | −0.05 + (0.03)                                                                            |
| Covariates                                                 | √                                                                                                      | √                                                                                         |
| Observations                                               | 2761                                                                                                   | 3075                                                                                      |
| R <sup>2</sup>                                             | 0.04                                                                                                   | 0.04                                                                                      |

Unstandardized beta-coefficients are displayed; robust standard errors (SE) in parentheses; \*\*  $p < 0.01$ , +  $p < 0.10$ ; Covariates include gender, age, marital status, education, employment status, presence of chronic diseases and self-rated health. Thus, a tick symbol (√) was used.
